# Supplementary material for: Size-controlled synthesis of anisotropic TiO2 single nanocrystals using microwave irradiation and their application for dye-sensitized solar cells
Source: Royal Society of Chemistry journal article supplement (doi:10.1039/c2dt32663a), 2013-01-01
Supplement: c2dt32663a.pdf [file c2dt32663a.pdf]

Supporting Information

**Size-controlled synthesis of anisotropic TiO<sub>2</sub> single nanocrystals using microwave irradiation and their application for dye-sensitized solar cells**

*Kazuhiro Manseki, Yousuke Kondo, Takayuki Ban, Takashi Sugiura, and Tsukasa*

*Yoshida\**

[\*] Prof. Tsukasa Yoshida

Graduate School of Engineering, Environmental and Renewable Energy System (ERES)

Division, Gifu University, Yanagido, Gifu 501-1193, Japan

E-mail: tyoshida@gifu-u.ac.jp

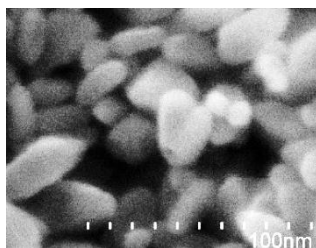

**Figure S1** A SEM image of the synthesized titania nanoparticles (i) by the microwave hydrothermal reaction at 180°C and 60 min. using colloidal titanate as the starting material. The concentration of TTIP and TMAOH were 0.10mM and 0.05mM, respectively.
